# Supplementary material
Source: MDPI journal article supplement (https://www.mdpi.com/2072-4292/15/7/1941)
Supplement: s1 [file s1]

Archive with 4 entries (4 files):
- Figure S1-lower.tif
- Figure S1-upper..tif
- Figure S2.tif
- Supplementary materials.pdf
