# Supplementary material
Source: MDPI journal article supplement (https://www.mdpi.com/2072-4292/15/7/1941)
Supplement: s1 [file s1 › Supplementary materials.pdf]

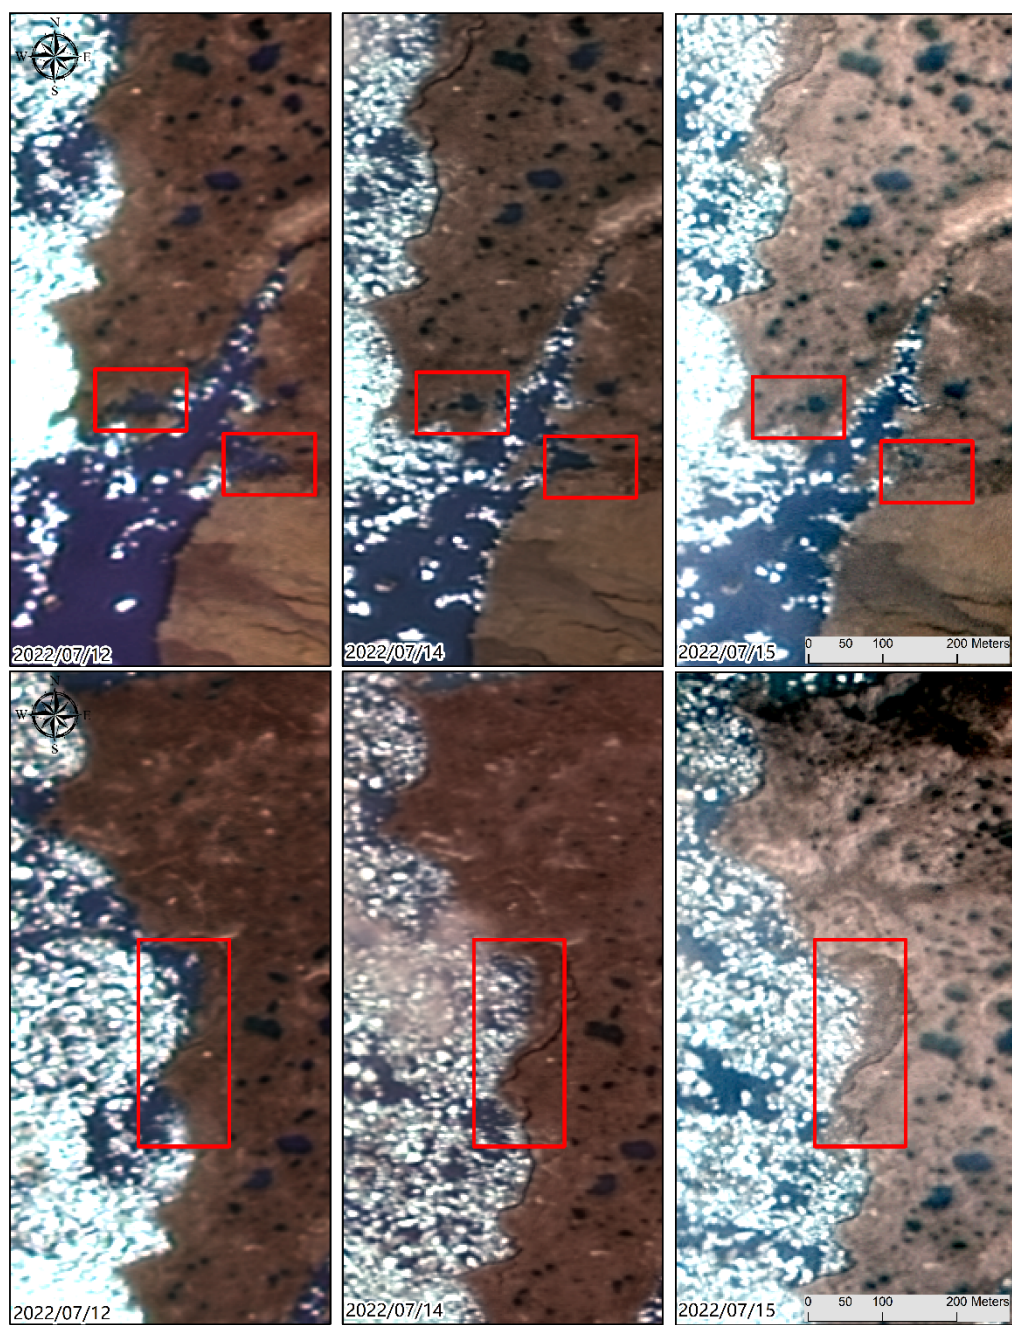

Figure S1. Changes in the lake area were observed at a regional scale

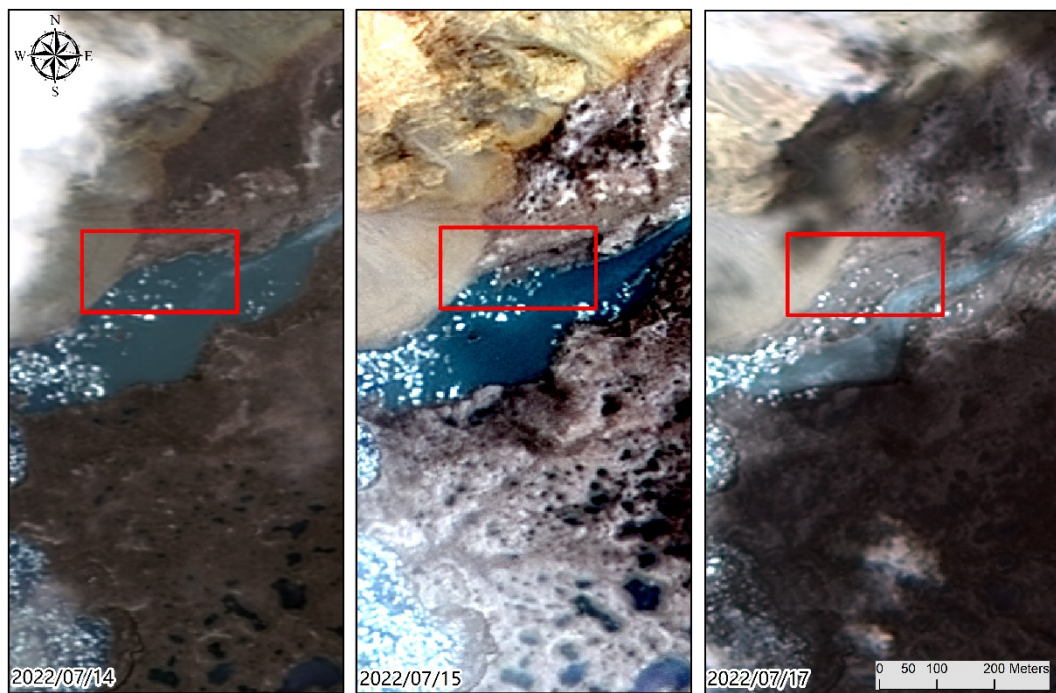

Figure S2. Changes in the connection between the upper and lower parts of the lake.
